# Supplementary material for: Effect on non-vascular outcomes of lowering LDL cholesterol in patients with chronic kidney disease: results from the Study of Heart and Renal Protection
Source: PubMed Central journal article supplement (PMC5412040; doi:10.1186/s12882-017-0545-2), 2017-05-01
Supplement: 12882_2017_545_MOESM2_ESM.pdf [file 12882_2017_545_MOESM2_ESM.pdf]

## Webfigure 1: All non-vascular SAEs, by particular baseline characteristics

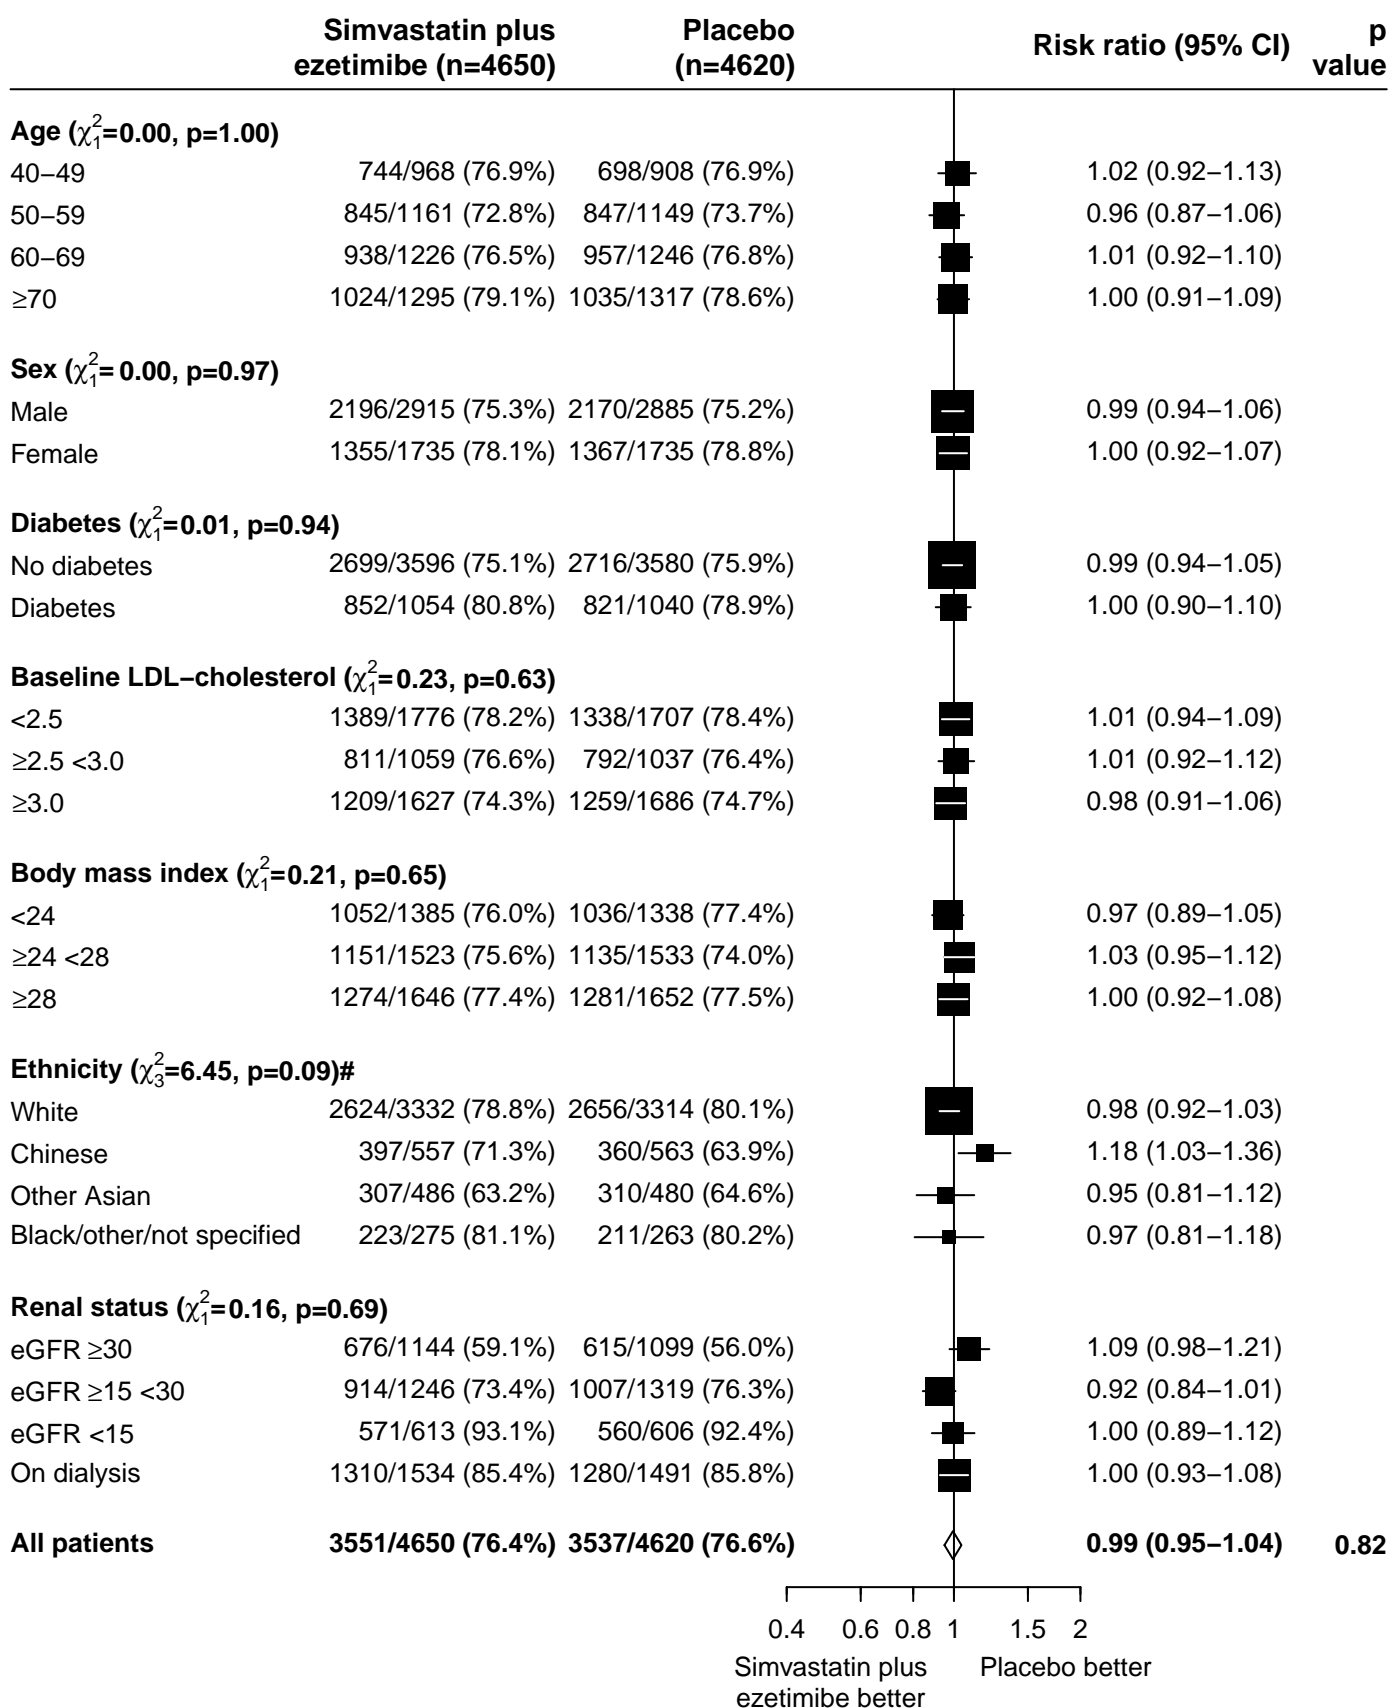

SAE=serious adverse event. eGFR = estimated glomerular filtration rate. #Subgroup analysis defined retrospectively.

**Webfigure 2: All non-vascular SAEs, by system of disease and dialysis status**

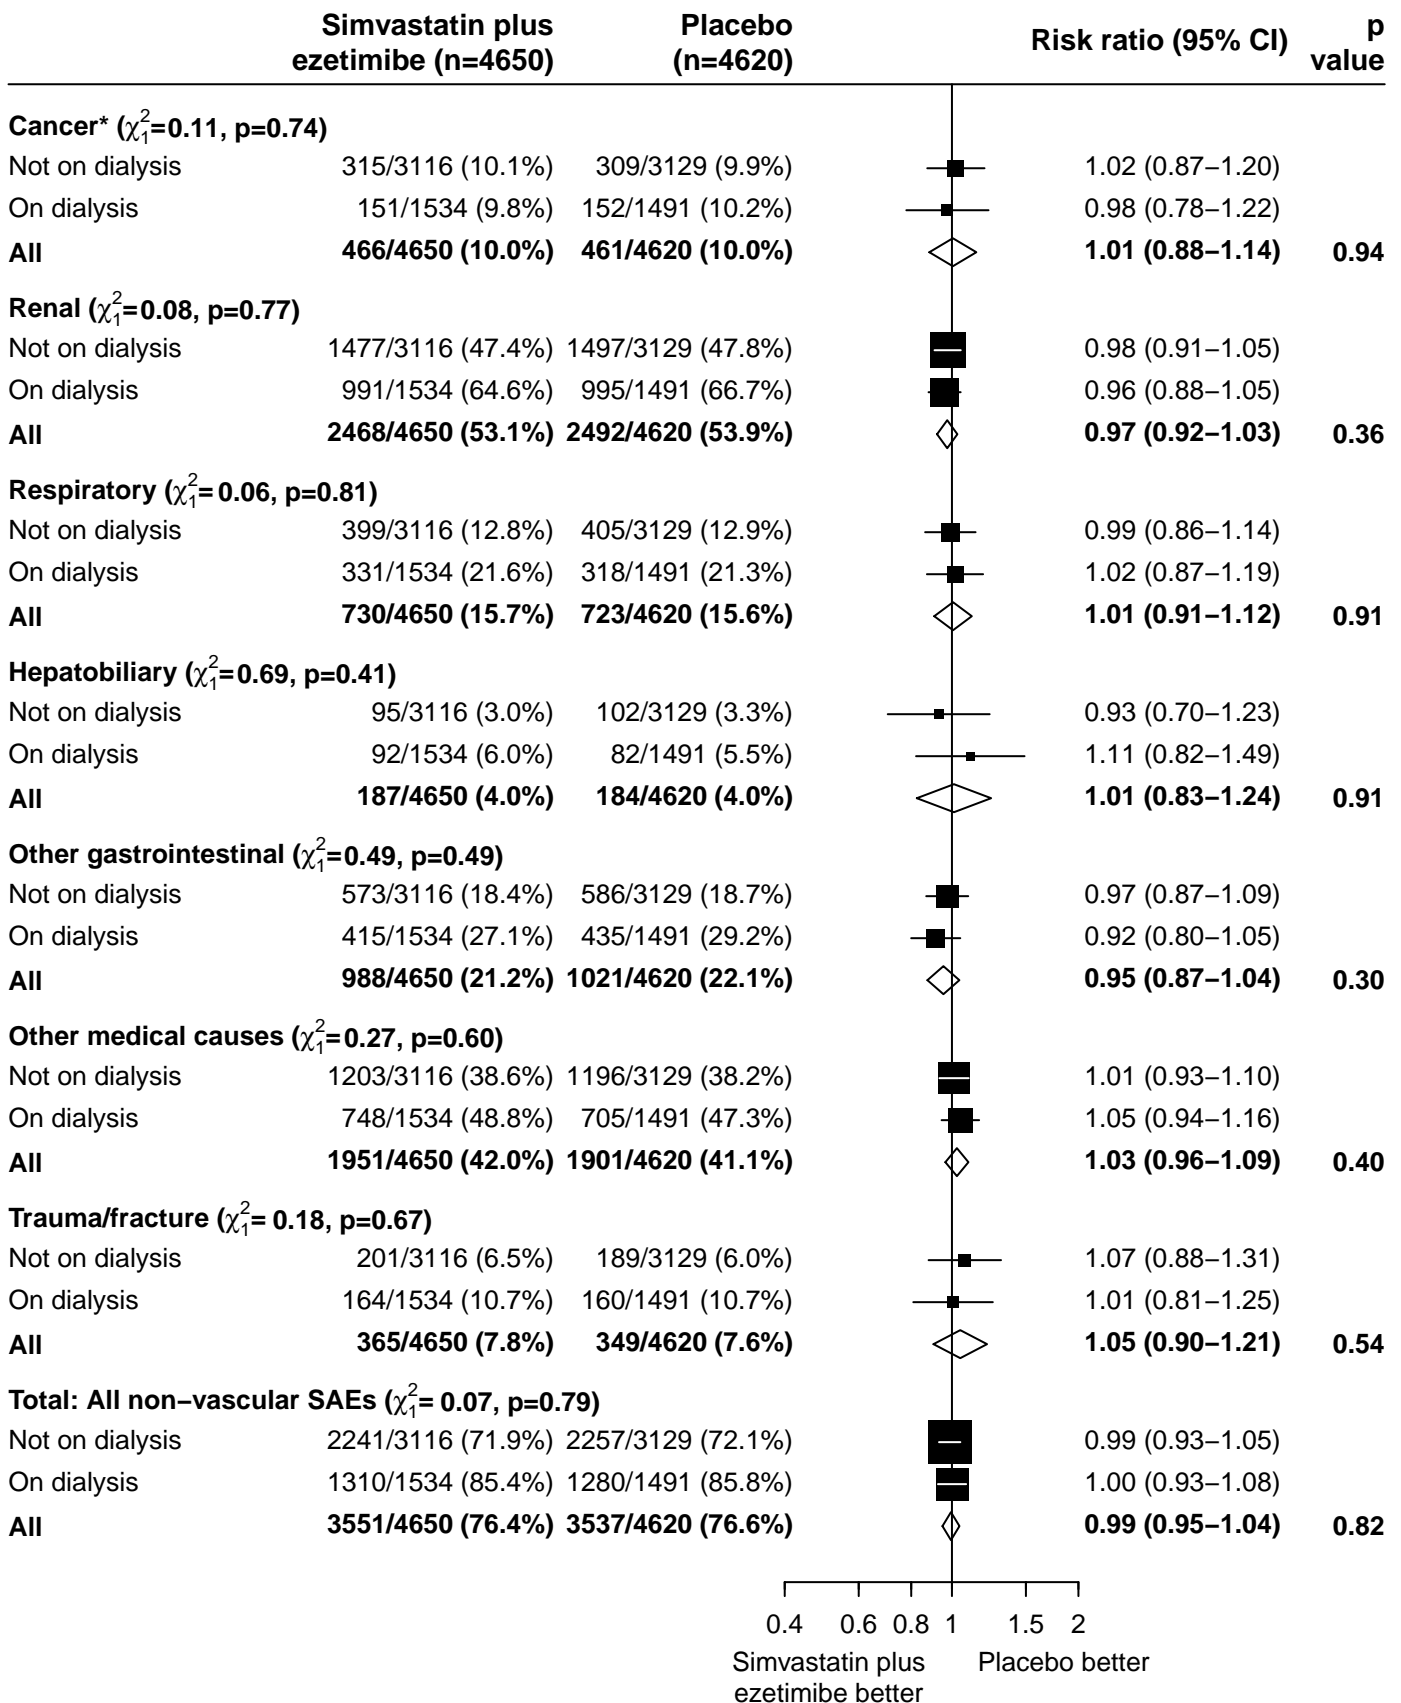

SAE=serious adverse event. \*Includes cancer complications and deaths from pre-randomization cancers.

**Webfigure 3: All non-vascular SAEs, by duration of follow-up**

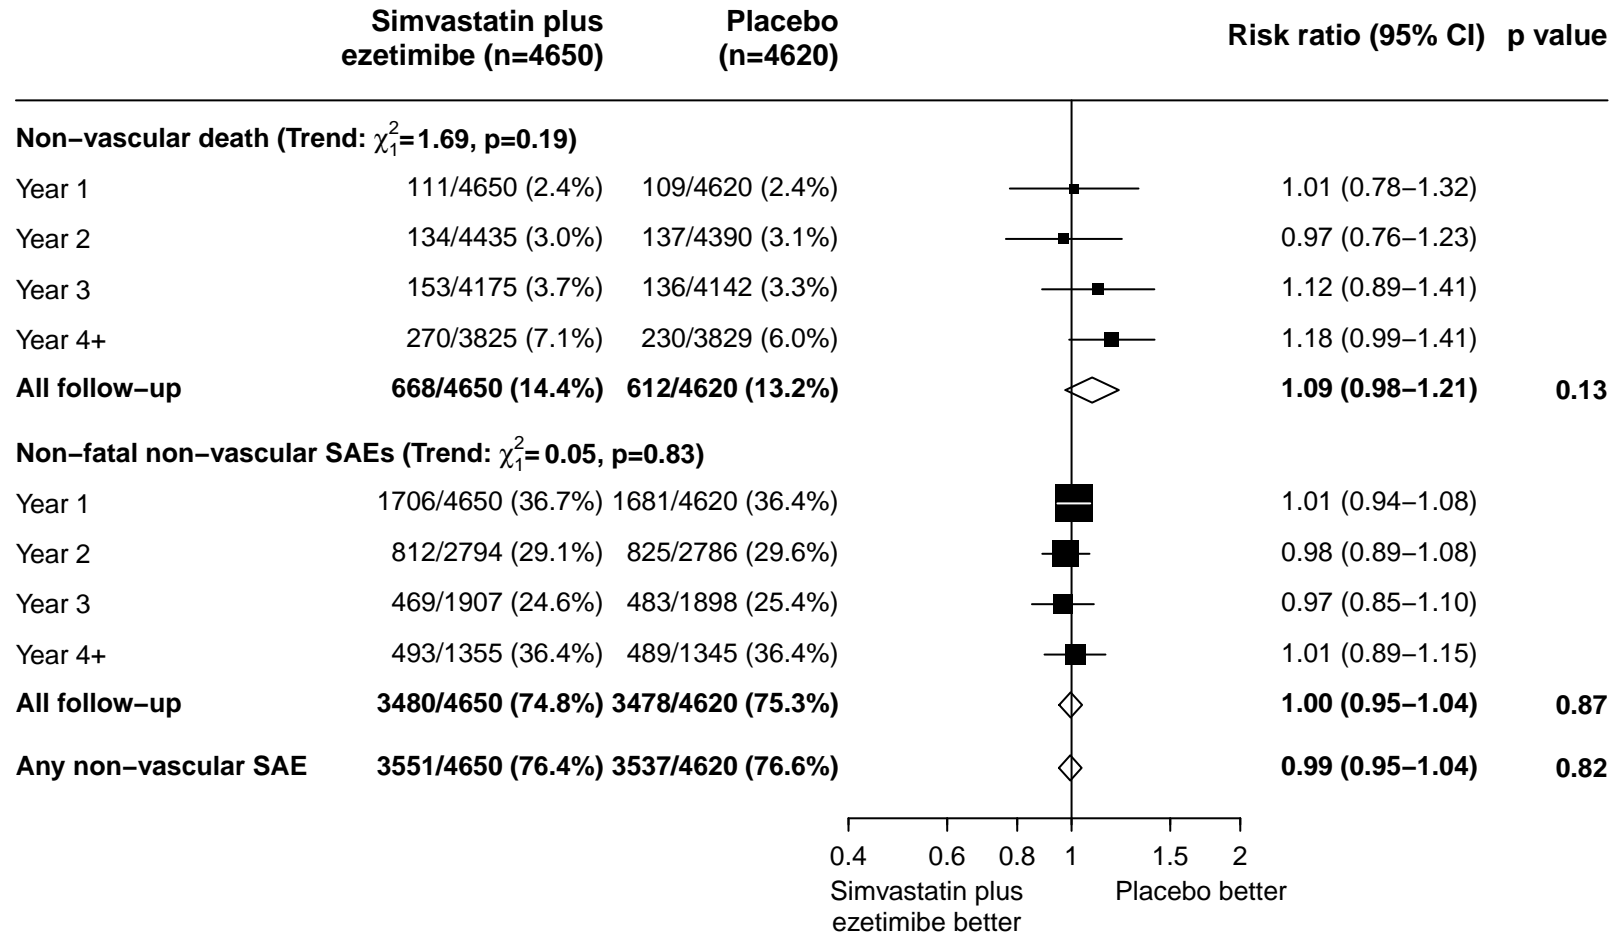

SAE=serious adverse event.
